# Supplementary material for: Minmers are a generalization of minimizers that enable unbiased local Jaccard estimation
Source: PubMed Central journal article supplement (PMC10505501; doi:10.1093/bioinformatics/btad512), 2023-08-21
Supplement: btad512_supplementary_data.pdf [file btad512_supplementary_data.pdf]

# Minmers are a generalization of minimizers that enable unbiased local Jaccard estimation

July 19, 2023

## 1 Supplementary Materials

### 1.1 Probabilistic filtering for the minhash

We construct a predictor,  $Y_i$ , of the numerator of the minhash formula for  $A$  and  $B_i$  conditioned on the size of the intersection  $|\pi_s(A) \cap \pi_s(B_i)|$ . This predictor generates a probability distribution for the ANI of a candidate mapping without needing compute the expensive  $\pi_s(A \cup B_i)$  step. We start by dividing  $\pi_s(A) \cup \pi_s(B_i)$  into two parts where  $C_i = \pi_s(A) \cap \pi_s(B_i)$  and  $G_i = (\pi_s(A) \cup \pi_s(B_i)) \setminus C_i$  resulting in two sets of size  $c_i$  and  $2s - c_i$ , respectively. The problem can now be formulated as follows: what is the probability that  $y$  elements from  $C_i$  are also part of the sketch  $\pi_s(A \cup B_i)$ ?

Leveraging the fact that  $\pi_s(A \cup B_i) = \pi_s(\pi_s(A) \cup \pi_s(B_i))$  and that all orderings of elements in  $\pi_s(A \cup B_i)$  are equally likely, we can view the problem as assigning the  $c_i$  shared elements to  $2s - c_i$  slots, where the first  $s$  slots are considered as a “success” and the remaining  $s - c_i$  slots are considered as a “failure” (Supplementary Figure 1).

We have the following formulas:

$$\begin{aligned} \Pr(Y_i = y | c_i) &= \text{Hypergeom}_{pdf}(2s - c_i, s, c_i, y) \\ &= \frac{\binom{s}{y} \binom{s - c_i}{c_i - y}}{\binom{2s - c_i}{c_i}} \end{aligned}$$

$$\begin{aligned} \Pr(Y_i \leq y | c_i) &= \text{Hypergeom}_{cdf}(2s - c_i, s, c_i, y) \\ &= \sum_{i=0}^{y-1} \Pr(Y_i = i | c_i) \end{aligned}$$

Let  $z = \arg \max_i c_i$  be a position with the maximum intersection size over all  $B_i$ , i.e. the position in  $B$  that overlaps with the most selected minmer intervals. We can now find a minimum intersection size  $\tau$  such that for any  $c_i < \tau$ ,

$$\Pr(\hat{J}(A, B_i) > \hat{J}(A, B_z) - \Delta_J) < 1 - \delta$$

21 where  $\Delta_J$  is the difference in the Jaccard that corresponds to an ANI value  $\Delta_{\text{ANI}}$  less than the ANI value  
 22 predicted by  $\hat{J}(A, B_z)$  and  $\delta$  is a desired confidence level. To calculate this probability, we can use the  
 23 following summation

$$\Pr(\hat{J}(A, B_i) > \hat{J}(A, B_z) - \Delta_J) = \sum_{y=0}^s \Pr(Y_i = y \mid c_i) \Pr(Y_z < y + \Delta_J \mid c_z)$$

24 For each intersection size, we can identify a cutoff in  $\mathcal{O}(s \log(s))$  time. As a preprocessing step, we  
 25 compute cutoffs for each of the  $s$  possible intersection sizes at the indexing stage. Candidate regions that  
 26 are unlikely to have an ANI within  $\Delta_{\text{ANI}}$  of the best predicted ANI are then pruned. The default  $\Delta_{\text{ANI}}$   
 27 and  $\delta$  confidence parameters of MashMap3 are 0 and 0.999, respectively, as in many cases the lower scoring  
 28 mappings for a segment are filtered out by the plane-sweep filtering method of MashMap described in Jain  
 29 *et al.* (2018).

30 We compute two passes over the interval endpoints in  $L$ . In the first pass of stage 1, the maximum  
 31 intersection size  $c_z$  is obtained. In the second pass, candidate mappings whose intersection is above the cutoff  
 32 derived from  $c_z$  are obtained. Consecutive candidate mappings are grouped into candidate regions and passed  
 33 to stage 2.

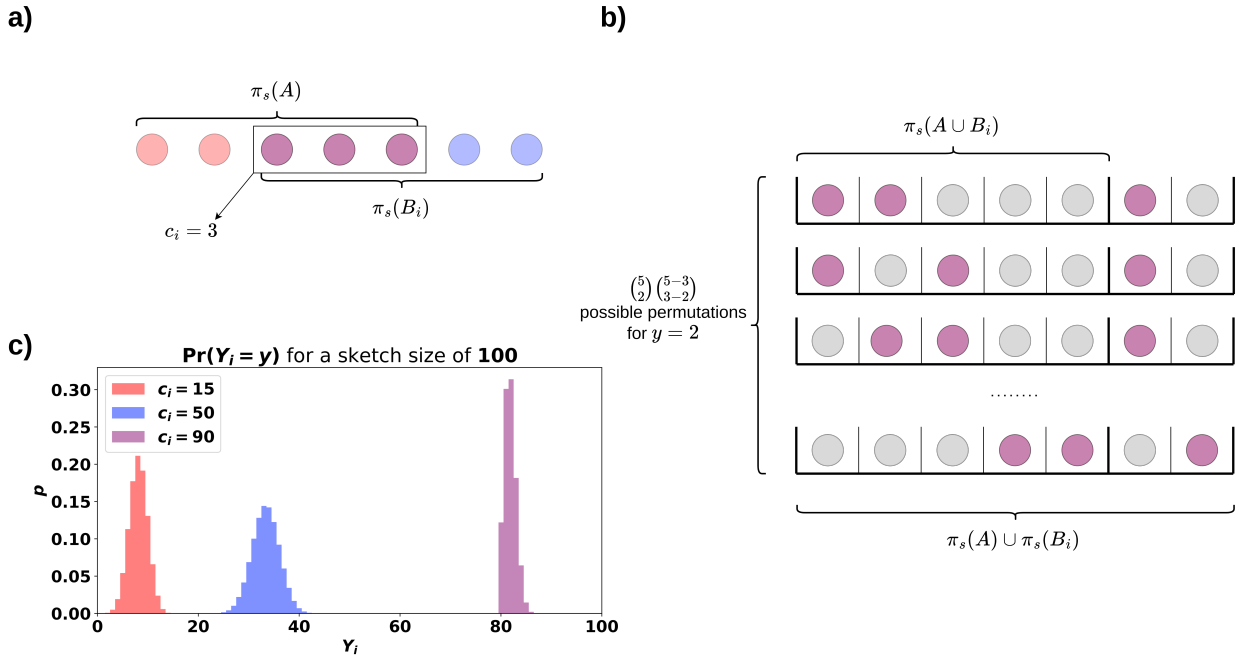

Supplementary Figure 1: **Estimating the minhash from  $\pi_s(A)$  and  $\pi_s(B_i)$ .** (a) Given two sketched sets  $\pi_s(A)$  and  $\pi_s(B_i)$ , we can compute the size of their intersection  $c_i$ . (b) By considering  $C_i = \pi_s(A) \cap \pi_s(B_i)$  as purple balls and  $G_i = (\pi_s(A) \cap \pi_s(B_i)) \setminus C_i$  as grey balls, we can enumerate all possible permutations of their union such that exactly  $y$  purple balls fall within the first  $s$  slots. (c) The distribution of the minhash numerator  $Y_i$  for different values of  $c_i$  when  $s = 100$ . The corresponding distribution of the minhash can be obtained by dividing  $Y_i$  by the sketch size  $s$ .

## 1.2 Efficiently computing the rolling minhash

To keep track of the rolling minhash for a candidate region, MashMap3 uses an array  $V = (-1, 0, 0)$ ,  $(x_1, \alpha_1, \beta_1)$ ,  $(x_2, \alpha_2, \beta_2)$ , ...,  $(x_s, \alpha_s, \beta_s)$  where each  $x_j$  represents one of the  $s$  minmer hash values from  $\pi_s(A)$  in increasing order and for each  $i \in [a, z)$ , the values  $\alpha_j$  and  $\beta_j$  are

- $\alpha_j = 1$  if  $x_j \in \pi_s(B_i)$  else 0
- $\beta_j = 1 + |\{x \in \pi_s(B_i) \text{ s.t. } x_{j-1} < x < x_j\}|$

We can imagine  $V$  as a set of  $s$  buckets labeled by the  $s$  corresponding hash values of  $A$  and sorted in increasing order. At each position  $i \in [a, z)$ , each bucket  $j$  holds  $x_j$  and all  $\beta_j - 1$  reference minmers in  $\pi_s(B_i)$  between  $x_j$  and  $x_{j-1}$ . A bucket is marked “good” ( $\alpha_j \rightarrow 1$ ) if  $x_j \in \pi_s(B_i)$ . It remains to find the largest integer  $p_i$  such that the number of minmers in the first  $p_i$  buckets is at most  $s$ . Given  $p_i$ , the numerator of the minhash formula,  $Y_i$ , is the number of “good” buckets in the first  $p_i$  buckets.

For a candidate region  $[a, z)$ , we initialize  $V$  by inserting all of the minmers from the reference index whose intervals overlap with  $a$  and set

$$p_a = \max_q \left( \sum_{j=0}^{j \leq q} \beta_j \leq s \right)$$

It follows that  $Y_a = \sum_{j=1}^{j \leq p_a} \alpha_j$

In order to keep track of intervals which overlap with the current position, we use a min-heap  $H$  sorted on interval endpoints. We then continue to iterate through minmer intervals from the reference in order based on their start points, stopping once the intervals no longer overlap with  $[a, z)$ . For each minmer interval starting at  $i \in [a + 1, z)$ , we pop intervals from  $H$  that end at or before  $i$ . For each interval popped from  $H$ , we update  $V$  in  $\mathcal{O}(\log(s))$  time through a binary search, decrementing the corresponding  $\beta_j$  and setting  $\alpha_j = 0$  if the interval represents a shared minmer. The new interval is added in a similar manner and the necessary  $\alpha$  and  $\beta$  values are updated. After  $V$  is updated,  $p_i$  is updated from  $p_{i-1}$  by incrementing or decrementing until it is the maximal value such that  $p_i = \max_q \left( \sum_{j=0}^{j \leq q} \beta_j \leq s \right)$ . By keeping track of  $p_{i-1}$  and the sums  $\sum_{j=0}^{j \leq p_{i-1}} \beta_j$  and  $\sum_{j=0}^{j \leq p_{i-1}} \alpha_j$ , the new  $p_i$  and corresponding sums are updated in constant time per window.

While the MashMap3 implementation of the second filtering stage still requires  $\mathcal{O}(\log(s))$  time to update the minhash for each sliding window within the candidate region, it is significantly more efficient than MashMap2’s ordered map in practice due to  $V$  being a static data structure in contiguous memory, only requiring updates to counters.

## 1.3 Minmer density

To obtain the density of the minmer scheme, we inspect how the rank of a  $k$ -mer changes with each sliding window. In particular, we use the rank of the  $k$ -mer in its first and last windows, i.e. the windows in which the  $k$ -mer is just entering and just about to leave. To inspect this, we characterize the distribution of the first rank, the distribution of the final rank given the first rank, and the probability of the rank ever being

64 less than or equal to  $s$  given the first and last ranks.

65 Let  $S$  be a sequence of  $2w - 1$  uniformly random numbers in  $[0, 1]$ . We denote the middle element at  
66 position  $w$  as  $z$ , its rank in the leftmost window of size  $w$  as  $r_1$ , and its rank in the rightmost window of size  
67  $w$  as  $r_w$ . Let  $C_{r_1, r_w}$  be a conditional indicator r.v. such that  $\Pr(C = 1 | r_1, r_w) = \Pr(C_{r_1, r_w} = 1)$  where  $C = 1$   
68 only if there exists a window of length  $w$  in  $S$  such that the rank of  $z$  in the window is at most  $s$ . This event  
69 corresponds to the element  $z$  being a minmer.

**Lemma 1.1.**

$$\Pr(C_{r_1, r_w}) = \begin{cases} \sum_{u=0}^{\delta} \Pr(U = u) \frac{\binom{2u+r_w-r_1}{u+r_w-s}}{\binom{2u+r_w-r_1}{u}} & r_1 > s, r_w > s \\ 1 & \text{otherwise} \end{cases}$$

70 where  $U \sim \text{Hypergeometric}(w - 1, r_1 - 1, w - r_w)$  and  $\delta = \min(r_1 - 1, w - r_w)$ .

71 *Proof.* Given the initial rank  $r_1$  and the final rank  $r_w$ , we can model the path of the rank as left and right  
72 unit steps on a number line starting at point  $r_1$  and ending at  $r_w$ . At each step in this path, the rank either  
73 increases, decreases, or remains the same. The event  $C_{r_1, r_w}$  is then equivalent to the event that the path  
74 touches the point  $s$  on the axis. Let  $\omega = \omega_{\text{left}} z \omega_{\text{right}}$  be a sequence of length  $2w - 1$  representing the elements  
75 in  $S$ . We let  $\omega_{\text{left}} = ppqqq\dots$  and  $\omega_{\text{right}} = qpqqp\dots$  where each element is labeled as  $p$  if it is less than  $z$  and  
76  $q$  otherwise. We define  $x$  and  $y$  as the number of  $ps$  and  $qs$  in  $\omega_{\text{left}}$ , respectively, and similarly  $a$  and  $b$  are  
77 the number of  $ps$  and  $qs$  in  $\omega_{\text{right}}$ , respectively. At step  $i$ , the rank  $z$  can decrease only if  $\omega_{\text{left}}[i] = p$  and  
78  $\omega_{\text{right}}[i] = q$ . Similarly, the rank will increase only if  $\omega_{\text{left}}[i] = q$  and  $\omega_{\text{right}}[i] = p$ . Otherwise, the rank will  
79 remain the same. We note that there can be no more than  $\max(r_1 - 1, w - r_w)$  left steps, as  $x = r_1 - 1$  and  
80  $b = w - r_w$ .

81 For each of the  $x$   $ps$  in  $\omega_{\text{left}}$ , we sample without replacement from  $\omega_{\text{right}}$ . By considering each sampling  
82 of a  $q$  as a success, we see that the number of left steps given the initial and final ranks  $r_1$  and  $r_w$  can be  
83 modeled as a hypergeometric random variable  $U \sim \text{Hypergeometric}(w - 1, x, b)$ .

84 With a set of  $u$  left steps, we can calculate the number of right steps  $v$  by observing that if we have  $u$   $pq$   
85 pairs, then there must be  $x - u$   $pp$  pairs,  $b - u$   $qq$  pairs, and therefore  $y - (b - u) = r_w - r_1 + u$   $qp$  pairs.  
86 Given a set of  $u$  left steps and  $v$  right steps, there are  $\binom{u+v}{u}$  total paths. Of these paths, we aim to find the  
87 ones which touch point  $s$  on the axis. Using the reflection principle Comtet (1974), we observe that there are  
88  $\binom{u+v}{u+r_w-s}$  such paths and therefore

$$\frac{\binom{u+v}{u+r_w-s}}{\binom{u+v}{u}} = \frac{\binom{2u+r_w-r_1}{u+r_w-s}}{\binom{2u+r_w-r_1}{u}}$$

89

□

90 With the conditional distribution  $C_{r_1, r_w}$  at hand, we can define the marginal distribution of  $C$ .

**Theorem 1.2.**

$$\Pr(C = 1) = \frac{1}{w} \sum_{r_1, r_w \in \{1 \dots w\}^2} \Pr(C = 1 | r_1, r_w) \Pr(R_w = r_w | r_1)$$

91 Where  $R_1 \sim \text{Uniform}\{1, w\}$  and  $R_w | r_1 \sim \text{BetaBinomial}(r_1, w - r_1 + 1)$  are random variables for the first  
 92 and last rank of  $z$ , respectively.

*Proof.* Given  $r_1$ , the initial rank of  $z$ , we can use order statistics for uniform distributions to infer that the value of  $z$  is sampled from a Beta distributed r.v.  $Z \sim \text{Beta}(r_1, w - r_1 + 1)$ . Given the value  $z$ , we can predict the final rank of  $z$  by considering the remaining  $w - 1$  elements as Bernoulli trials each with probability  $z$  of having a lower value than  $z$ . Therefore, we have that  $R_w | z \sim \text{Bin}(w - 1, z)$ . We can obtain the marginal of  $R_w$  via

$$\Pr(R_w = r_w) = \int_0^1 \Pr(R_w = r_w | p) \Pr(Z = z) dp$$

93 which is the Beta-binomial distribution with  $n = w - 1$ ,  $\alpha = r_1$  and  $\beta = w - r_1 + 1$ . □

94 **1.4 Minmer interval density**

95 We will prove the density of minmer intervals in a similar fashion to the proof for minimizers. We define a  
 96 window of length  $w$  as at position  $i$  as  $W_i$  and say  $W_i$  is *charged* if  $\pi_s(W_i) \neq \pi_s(W_{i-1})$ . Like minimizers, the  
 97 set of minmers between two adjacent windows can differ by at most one, as only a single minmer can leave  
 98 the sketch at a time. Unlike minimizers, though, it is possible for a  $k$ -mer at position  $i$  to charge multiple  
 99 windows by exiting and then re-entering the sketch. Therefore, the number of charged windows in a sequence  
 100 is at least the number of minmers.

101 Consider a super-window of  $w + 1$   $k$ -mers starting at position  $i - 1$  and let  $\pi_s(W_i \cup W_{i-1})$  be the lowest  
 102  $s$   $k$ -mers in the super-window.  $W_i$  is then not charged if and only if both  $x_{i-1} \notin \pi_s(W_i \cup W_{i-1})$  and  
 103  $x_{i+w-1} \notin \pi_s(W_i \cup W_{i-1})$ . Assuming each position is equally likely to be part of the sketch, the probability  
 104 of the first and last  $k$ -mers not being in the sketch is  $\binom{w-1}{s} / \binom{w+1}{s}$  and therefore the probability that  $W_i$  is  
 105 charged is

$$\begin{aligned} \Pr(W_i \text{ is charged}) &= 1 - \frac{\binom{w-1}{s}}{\binom{w+1}{s}} \\ &= 1 - \frac{(w-s+1)(w-s)}{w(w+1)} \end{aligned}$$

106 Assuming independence over windows, we have that the density of charged windows is equal to the  
 107 probability that any window is charged and therefore the density of minmer intervals is  $1 - \frac{(w-s+1)(w-s)}{w(w+1)}$ .

108 **1.5 Minmer spread**

109 We now turn our attention to characterizing the distribution of distances between adjacent minmers using a  
 110 proof described in joriki (2012).

111 Consider a window of length  $w + 1$  which contains  $s$  sampled  $k$ -mers and is anchored at the left-most  
 112 sampled  $k$ -mer. Assuming a set of  $w + 1$  unique  $k$ -mers, we have that each of the  $w + 1$   $k$ -mers is equally likely  
 113 to be sampled. Let  $X_1, \dots, X_{s-1}$  be a set of integers randomly sampled from  $\{1, \dots, w\}$  such that  $X_i < X_{i+1}$ .  
 114 We define the distance between  $X_i$  and  $X_{i+1}$  as  $G_i = X_{i+1} - X_i$ . We let  $X_0 = 0$  represent the first  $k$ -mer in  
 115 the window positioned at the first location.

116 **Lemma 1.3.**  $\Pr(G_i = d) = \frac{\binom{w-d}{s-2}}{\binom{w}{s-1}}$

117 *Proof.* Let us consider our  $w + 1$  unique sorted integers arranged on a circle instead of a line. We then “cut”  
 118 the circle at any one of the  $s$  sampled integers and renumber the  $w$  remaining integers starting from 1 after  
 119 the cut. There are now  $s - 1$  integers uniformly sampled from  $\{1, \dots, w\}$ . By fixing the first sample at position  
 120  $d$  and enforcing that all  $s - 2$  remaining integers are sampled from  $\{d + 1, \dots, w\}$ , we see that there are  $\binom{w-d}{s-2}$   
 121 such samples. Given that there are  $\binom{w}{s-1}$  ways to sample the  $s - 1$  integers, the distance  $d$  between the cut  
 122 and the first sampled point is then distributed as  $\frac{\binom{w-d}{s-2}}{\binom{w}{s-1}}$ . As this analysis is symmetric for any “cut,” we  
 123 claim that the distribution of all  $G_i$  are identical.  $\square$

124 While the analysis above is conditioned on the case where we have  $s$  uniformly random chosen positions,  
 125 the number of sampled positions varies across windows and is only lower-bounded by  $s$ . If we replace  $s$  with  
 126 the expected number of minmers in the window,  $d_f$ , we can obtain an approximation of the distribution  
 127 of distances (Figure 2). A more rigorous analysis, which is beyond the scope of this work, would require a  
 128 distribution for the number of sampled positions in a window rather than just the expectation.

129 Unfortunately, this distribution is not that useful on its own. Given that the distribution of the distance  
 130 is the same across all points, we have that  $(s + 1) \mathbb{E}[G_i] = w + 1$  and therefore  $\mathbb{E}[G_i] = (w + 1)/(s + 1)$ . Even  
 131 more interesting than the expectation, though, are the order statistics of  $G_i$ , such as  $\max G_i$ .

132 In *Order Statistics* David and Nagaraja (2004), a similar problem is studied where a rope of length 1 is  
 133 cut at  $n$  randomly selected locations. The authors show that the expected length of the longest segment  
 134 is  $H_{n+1}/(n + 1)$ , where  $H_n$  is the  $n$ th harmonic number. The details of the problem we describe above are  
 135 slightly different, as the “cut-points” are selected from a set of integers without replacement as opposed to  
 136 sampled from  $[0, 1]$ . We can use this to define  $\bar{\mathcal{G}}_i$ , an estimator for  $\max G_i$ ,

$$\bar{\mathcal{G}}_i = (w + 1) \frac{H_{d_f+1}}{d_f + 1}$$

137 As  $w$  grows, the effect of sampling without replacement grows smaller and the error of  $\bar{\mathcal{G}}_i$  becomes solely  
 138 from the fact that  $d_f$  is only an expectation of the number of minmers in a window.

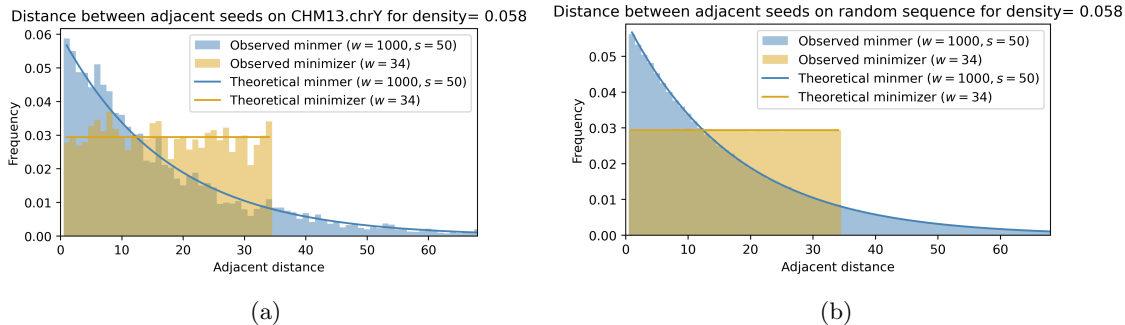

Supplementary Figure 2: **Simulated and empirical spread.** The spread of minmers and minimizers under similar densities on the human Y-chromosome (a) and a simulated random sequence (b).

### 139 1.6 Median prediction error for simulated sequences

140 If an unbiased Jaccard estimator is generated from a symmetric distribution, then the expected median  
 141 Jaccard and mean Jaccard would be identical. More importantly, the median ANI would also be unbiased,  
 142 whereas the mean ANI would not necessarily be unbiased.

143 While the parameters used to replicate the experiments for Table 1 in Belbasi *et al.* (2022) yield a fairly  
 144 symmetric hypergeometric distribution for the minhash, when the true Jaccard between two sequences is very  
 145 close to 0 or 1 or the sketch size is decreased, the asymmetry in the hypergeometric distribution is increased,  
 146 resulting in notable discordance between the mean and median of the Jaccard estimator. In these cases, an  
 147 unbiased predictor of the mean Jaccard is not necessarily an unbiased predictor of the median Jaccard and  
 148 therefore also not an unbiased predictor of the median ANI.

149 The median results for the replicated Belbasi *et al.* (2022) experiment as well as the median results for the  
 150 simulated read mappings can be found in Supplementary Figure 3 and Supplementary Table 1, respectively.

|         | Minimap2     | MashMap2     | MashMap3     |
|---------|--------------|--------------|--------------|
| Dataset | Median error | Median error | Median error |
| CLR-99  | <b>0.00</b>  | -0.25        | 0.05         |
| CLR-98  | <b>0.02</b>  | -0.31        | 0.10         |
| CLR-95  | <b>0.06</b>  | 0.20         | 0.27         |

Supplementary Table 1: **Median error for ANI estimates of simulated human Nanopore reads.** Minmer and minimizer-based MashMap implementations as well as Minimap2 were used to map simulated reads from the human reference genome using Pbsim Ono *et al.* (2013).

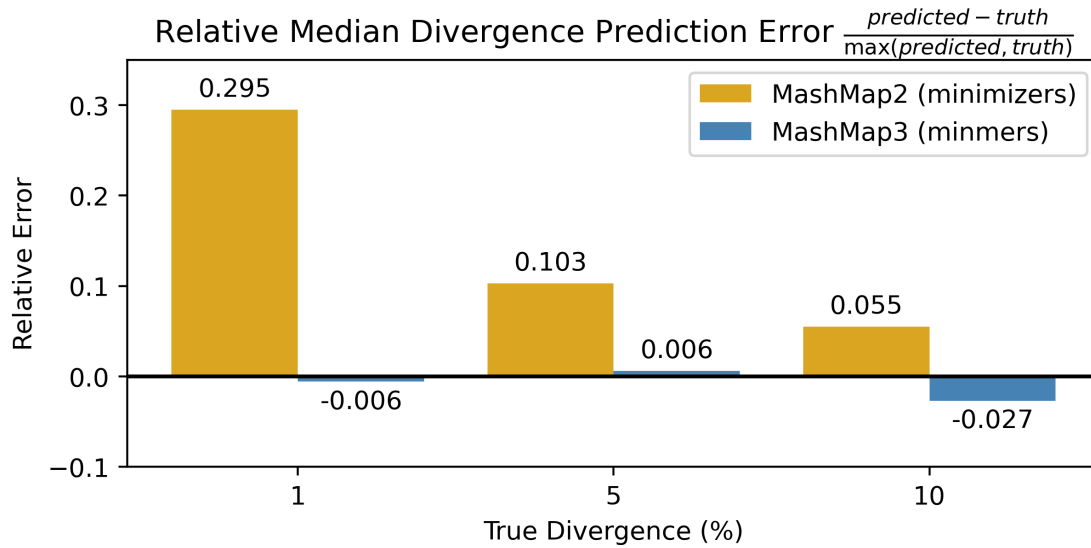

Supplementary Figure 3: **Median error on ideal sequences.** Experiments from Belbasi *et al.* (2022) were replicated with MashMap3, and the relative median prediction error is reported.



151 **1.7 Indexing requirements across different parameters**

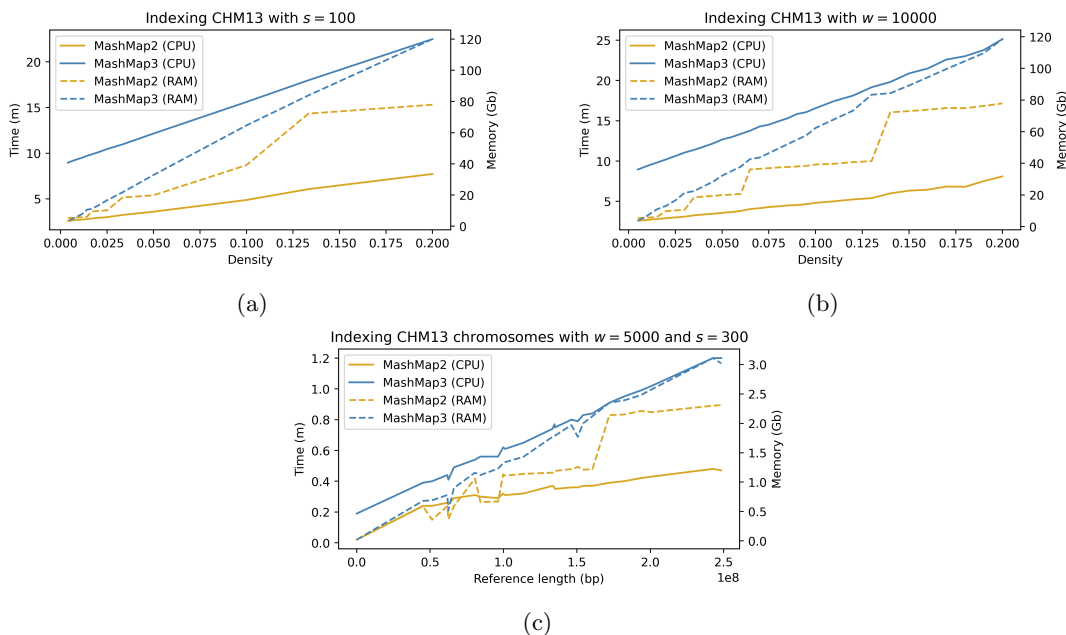

Supplementary Figure 4: **Indexing the CHM13 assembly with different parameters.** In (a), the window length was changed while holding the sketch size at  $s = 100$ , resulting in a range of densities from 0.01 to 0.20. Similarly, in (b) the window length was held at  $w = 10000$  while the sketch size was varied to generate sketches with densities from 0.01 to 0.20. In (c), performance benchmarks were generated from indexing each of the CHM13 chromosomes separately with  $w = 5000$  and  $s = 300$ .

152 **1.8 Simulated read results and the effects of indels**

| Difference Ratio | CLR-95 ME | CLR-98 ME | CLR-99 ME |
|------------------|-----------|-----------|-----------|
| 20:40:40         | 0.30      | 0.11      | 0.05      |
| 100:00:00        | 0.00      | -0.02     | -0.02     |

Supplementary Table 2: **The effect of indels on ANI prediction error.** For error rates of 1%, 2%, and 5%, Pbsim was used to generate two datasets, one with a mismatch, insertion, deletion ratio of 20:40:40 and another with mismatches only (100:00:00). ANI was estimated from the Jaccard using the binomial model.

153 **1.9 ANI prediction performance on low-complexity queries**

| Query species | ANI threshold | MashMap2               |             |                     | MashMap3               |             |                     |
|---------------|---------------|------------------------|-------------|---------------------|------------------------|-------------|---------------------|
|               |               | Basepairs mapped (Gbp) | Mean error  | Mean absolute error | Basepairs mapped (Gbp) | Mean error  | Mean absolute error |
| chimpanzee    | 95%           | 0.01                   | <b>0.76</b> | <b>1.36</b>         | 0.01                   | 1.05        | 1.51                |
| chimpanzee    | 90%           | 0.03                   | 4.51        | 4.76                | 0.03                   | <b>4.43</b> | <b>4.63</b>         |
| chimpanzee    | 85%           | 0.04                   | 4.85        | 5.11                | 0.04                   | <b>4.81</b> | <b>5.03</b>         |
| macaque       | 95%           | <0.01                  | <b>0.63</b> | 1.66                | <0.01                  | 0.86        | <b>1.55</b>         |
| macaque       | 90%           | <0.01                  | 2.13        | 2.96                | <0.01                  | <b>0.72</b> | <b>1.74</b>         |
| macaque       | 85%           | 0.05                   | 9.79        | 9.88                | <b>0.08</b>            | <b>7.98</b> | <b>8.03</b>         |

Supplementary Table 3: **Proportion and accuracy of low-complexity mappings.** MashMap2 and MashMap3 were used to align the human reference genome to chimpanzee and macaque genomes. The number of aligned query query nucleotides from low-complexity segments as well as the mean error and mean absolute error of the mappings are reported here.

154 **References**

155 Belbasi, M. *et al.* (2022). The minimizer jaccard estimator is biased and inconsistent. *Bioinformatics*.

156 Comtet, L. (1974). *Advanced Combinatorics: The art of finite and infinite expansions*. Springer Science &  
157 Business Media.

158 David, H. A. and Nagaraja, H. N. (2004). *Order statistics*. John Wiley & Sons.

159 Jain, C. *et al.* (2018). A fast adaptive algorithm for computing whole-genome homology maps. *Bioinformatics*,  
160 **34**(17), i748–i756.

161 joriki (2012). Distribution probability of elements and pair-wise differences in a sorted list. Mathematics  
162 Stack Exchange. URL:<https://math.stackexchange.com/q/247409> (version: 2012-11-30).

163 Ono, Y. *et al.* (2013). Pbsim: Pacbio reads simulator—toward accurate genome assembly. *Bioinformatics*,  
164 **29**(1), 119–121.
